# Supplementary material
Source: PubMed Central journal article supplement (PMC2794048)

## SUPPLEMENTAL FIGURES AND LEGENDS

**Figure I: Shh stimulation of *ptc1* expression in SMC *in vitro*.** Representative immunocytochemical staining of Ptc1 expression in rat and human aortic SMC. Cells were treated with or without recombinant Shh (3.5  $\mu\text{g/ml}$ ) for 24 h before *ptc1* expression was examined. The immunoglobulin control and smooth muscle cell  $\alpha$ -actin is also presented and magnification is 40 x for all panels.

**Figure II: Shh stimulates Notch target gene expression in rat SMC *in vitro*.** (a) The effect of Hh activation with recombinant Shh (3.5  $\mu\text{g/ml}$ ) and Hh inhibition with cyclopamine (40 $\mu\text{M}$ ) on baseline Hrt protein expression. The effect of (b) Hh activation with recombinant Shh (3.5  $\mu\text{g/ml}$ ) and (c) Hh inhibition with cyclopamine (40 $\mu\text{M}$ ) on baseline Hrt mRNA levels in SMC (d) The effect of cyclopamine on rShh stimulated Hrt-3 mRNA levels (mean  $\pm$  SEM n=3, normalized to GAPDH) and protein expression (representative blot shown). \* $p\leq 0.05$  vs control, \*\* $p\leq 0.05$  vs Shh alone.

**Figure III. Shh stimulates Notch Target gene expression in a CBF-1/RBP-J $\kappa$ -dependent manner.** (a) Shh protein levels in SMC following ectopic expression of full-length mouse Shh cDNA and the subsequent effect of ectopic expression of Shh on *Hrt-1*, 2 and 3 mRNA levels in SMC following inhibition of CBF-1/RBP-J $\kappa$ -dependent Notch signaling by co-transfection with RPMS-1, \*  $p\leq 0.05$  vs Mock Control, \*\*  $p\leq 0.05$  vs Shh. (b) The temporal effects of serum stimulation on transactivation of CBF-1/RBP-J $\kappa$  regulated promoter activity following co-transfection with 0.5  $\mu\text{g}/10\text{ cm}^2$  RPMS-1 and 0.5  $\mu\text{g}/10\text{ cm}^2$  R218H-RBP-J $\kappa$ . Cells were transfected with CBF-1/RBP-J $\kappa$  dependent reporter plasmid, pGa981-6, or control vector pGa50-7, lacking the CBF-1 enhancer, prior to serum stimulation over time, \*  $p\leq 0.05$  vs control and (c) The effect of the dominant negative R218H-RBP-J $\kappa$  on rShh (3.5  $\mu\text{g/ml}$ ) stimulation of Hrt-3 mRNA levels in SMC following transfection of cells with R218H-RBP-J $\kappa$ . The cumulative data represents the mean values from three independent experiments  $\pm$  SEM, \* $p\leq 0.05$  vs control, \*\* $p\leq 0.05$  vs Shh alone.

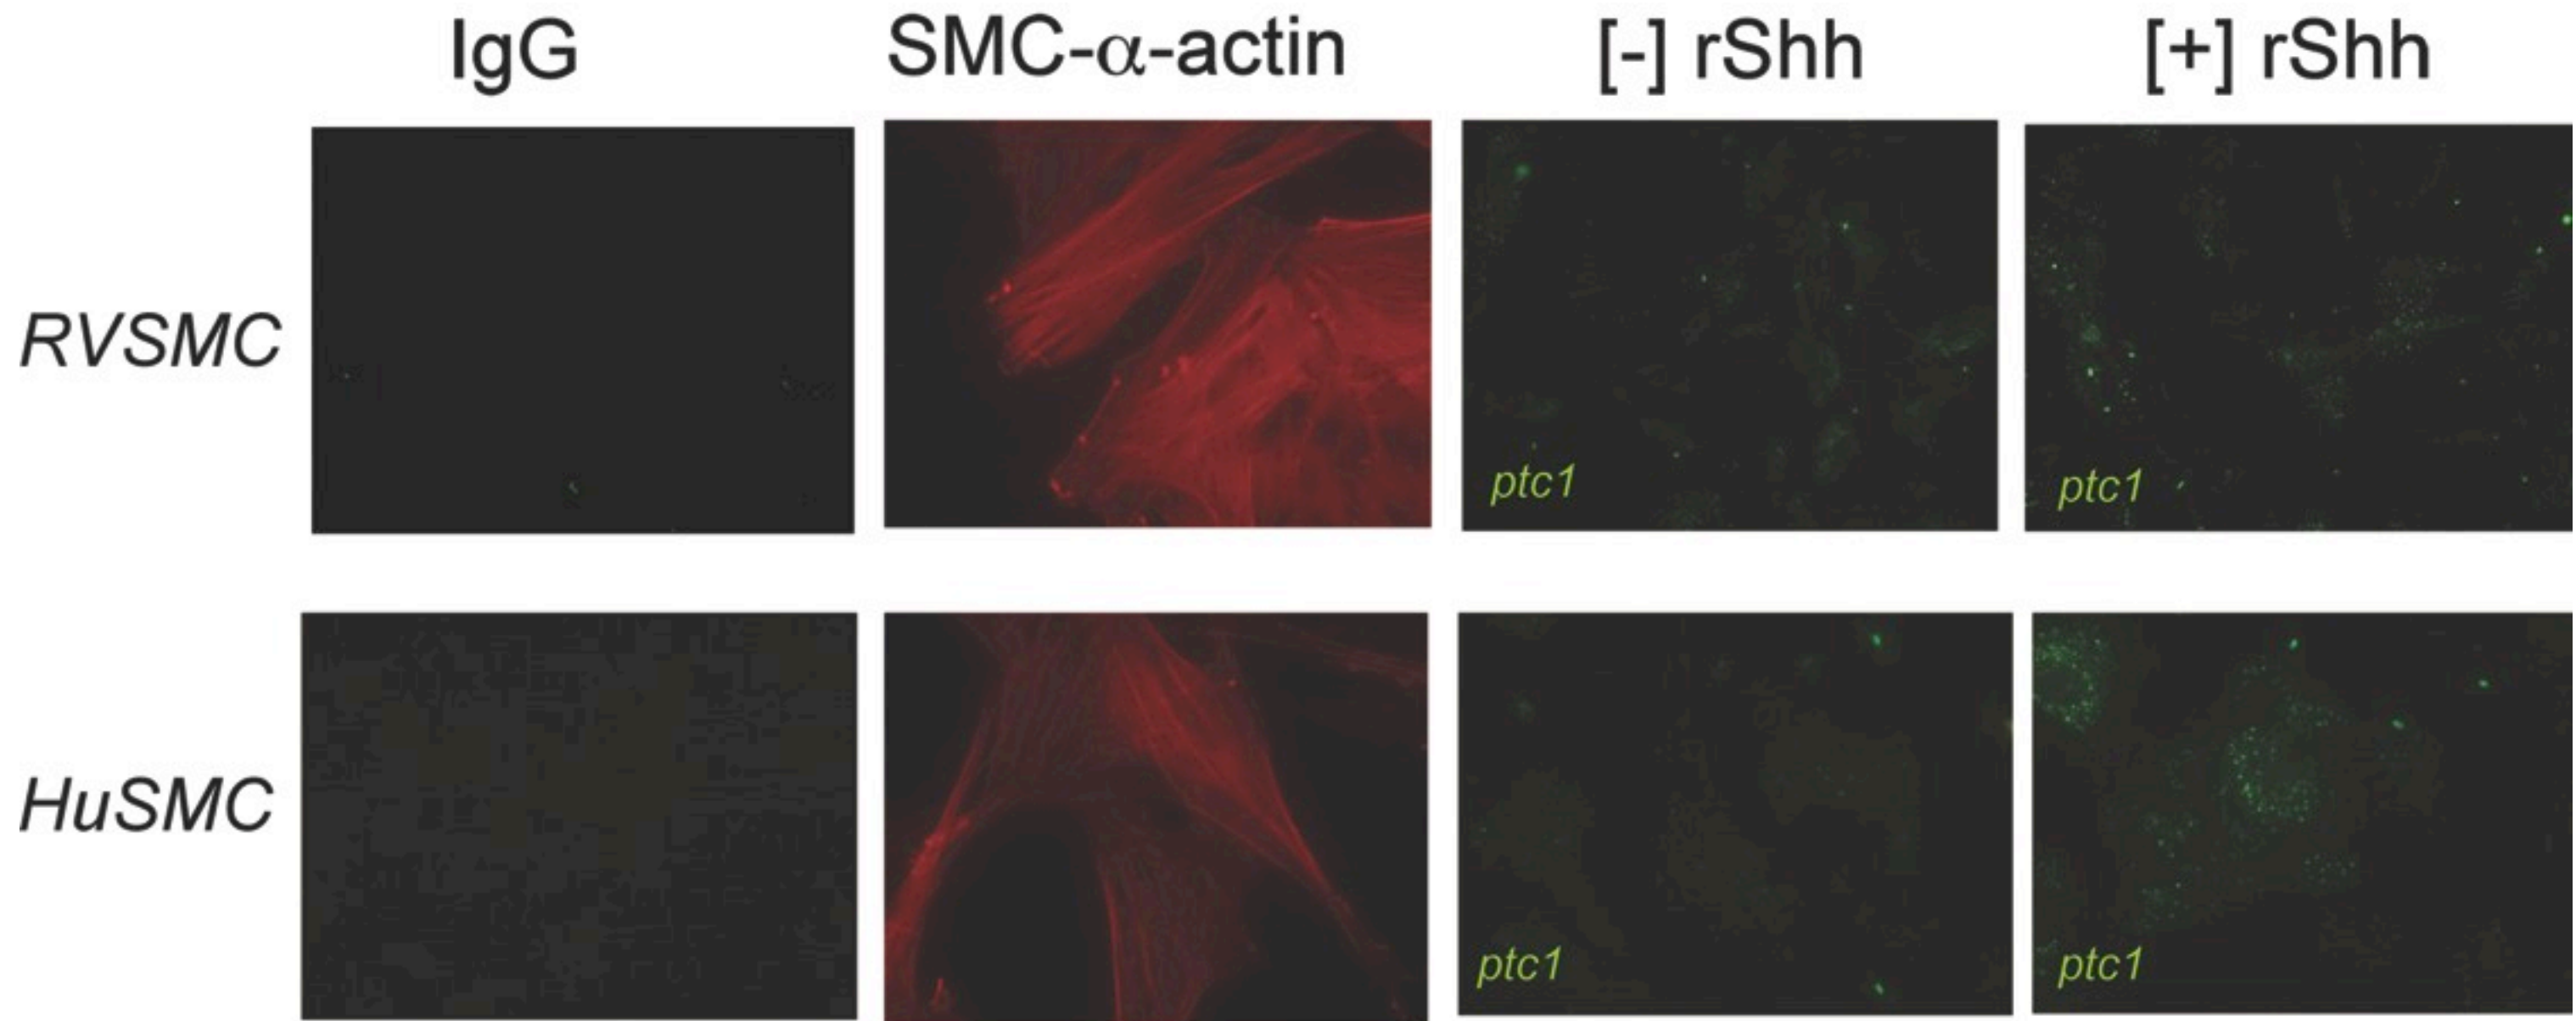

*Supplemental Figure 1*

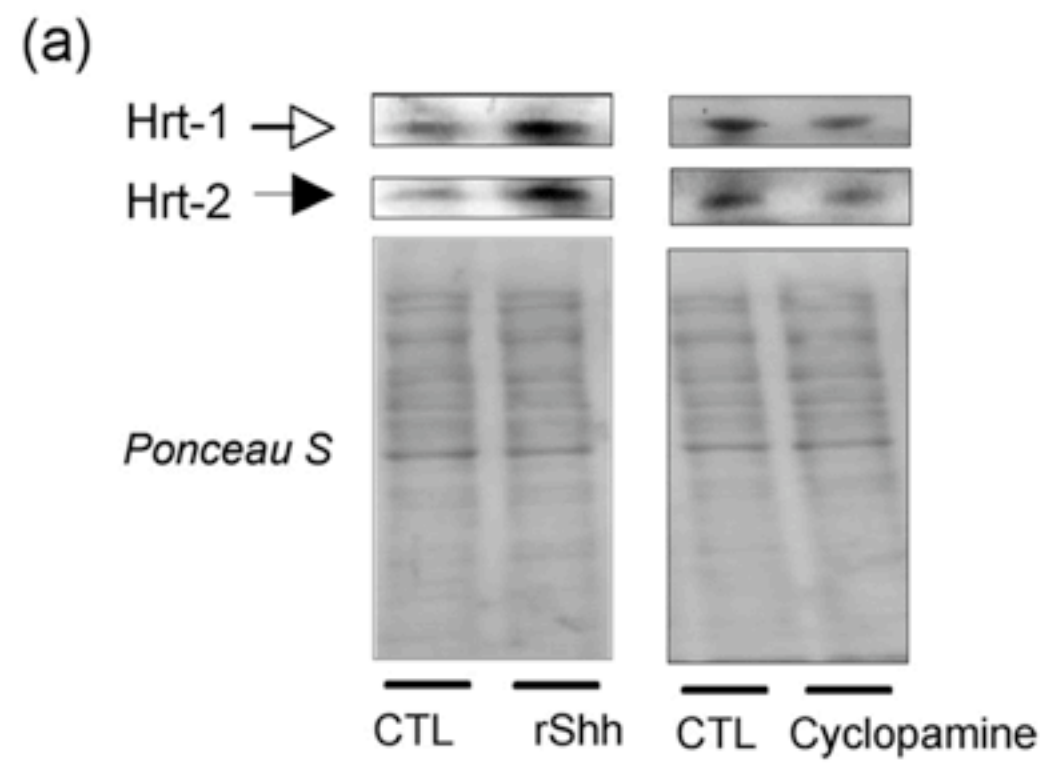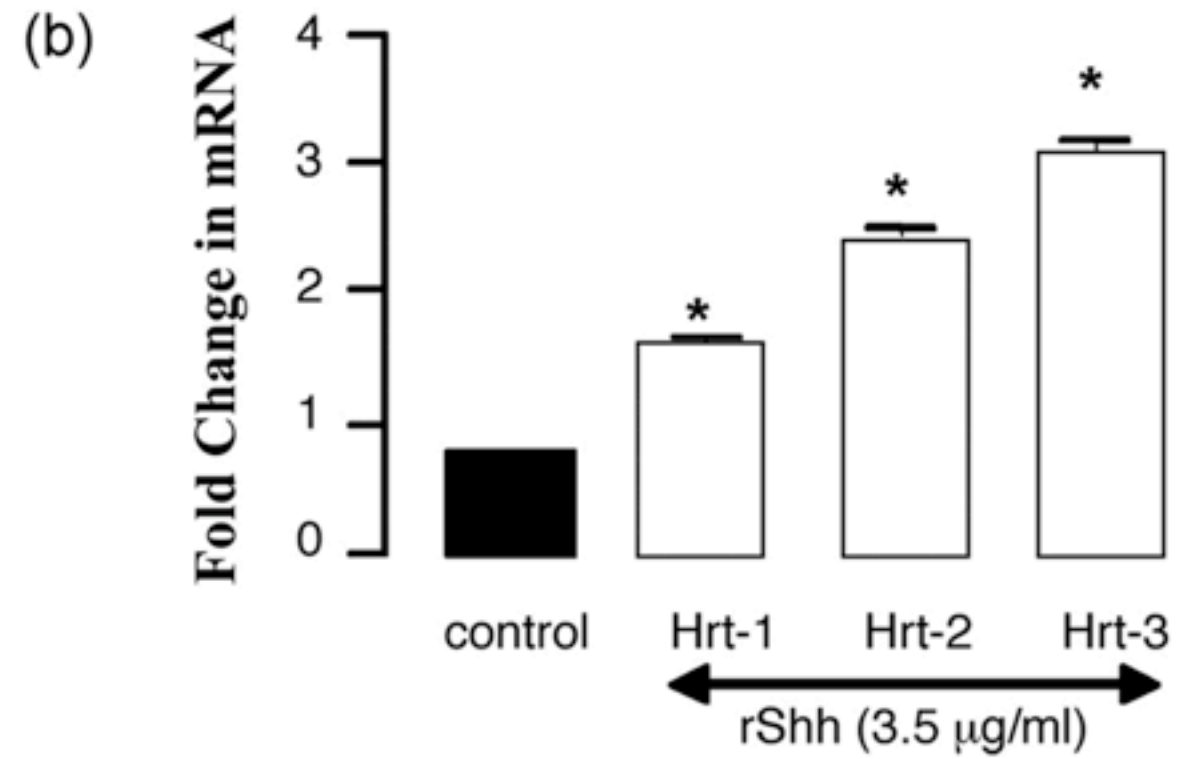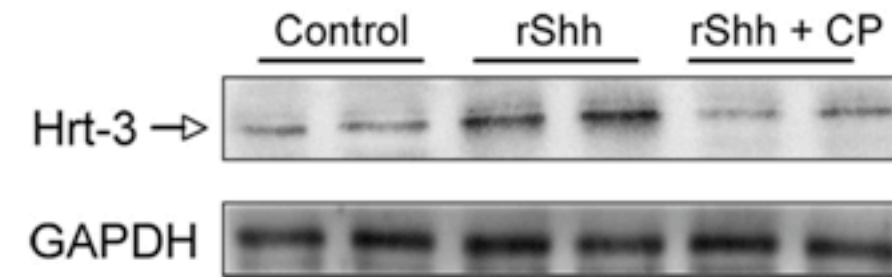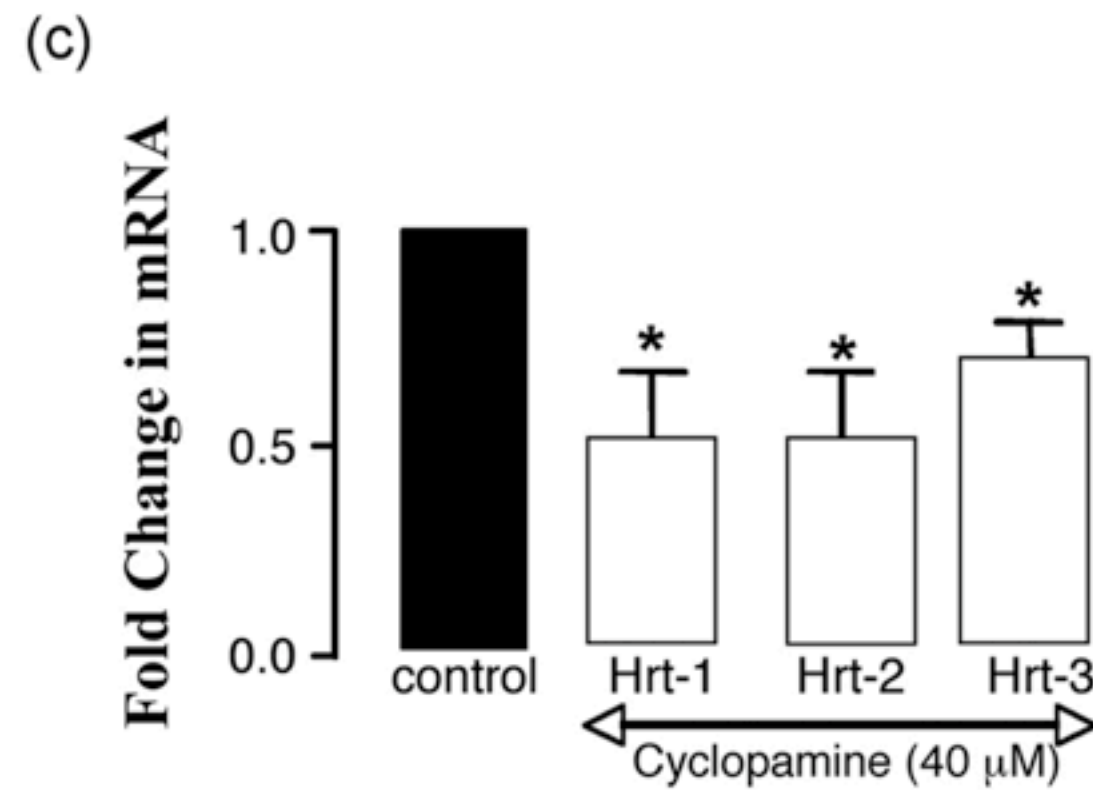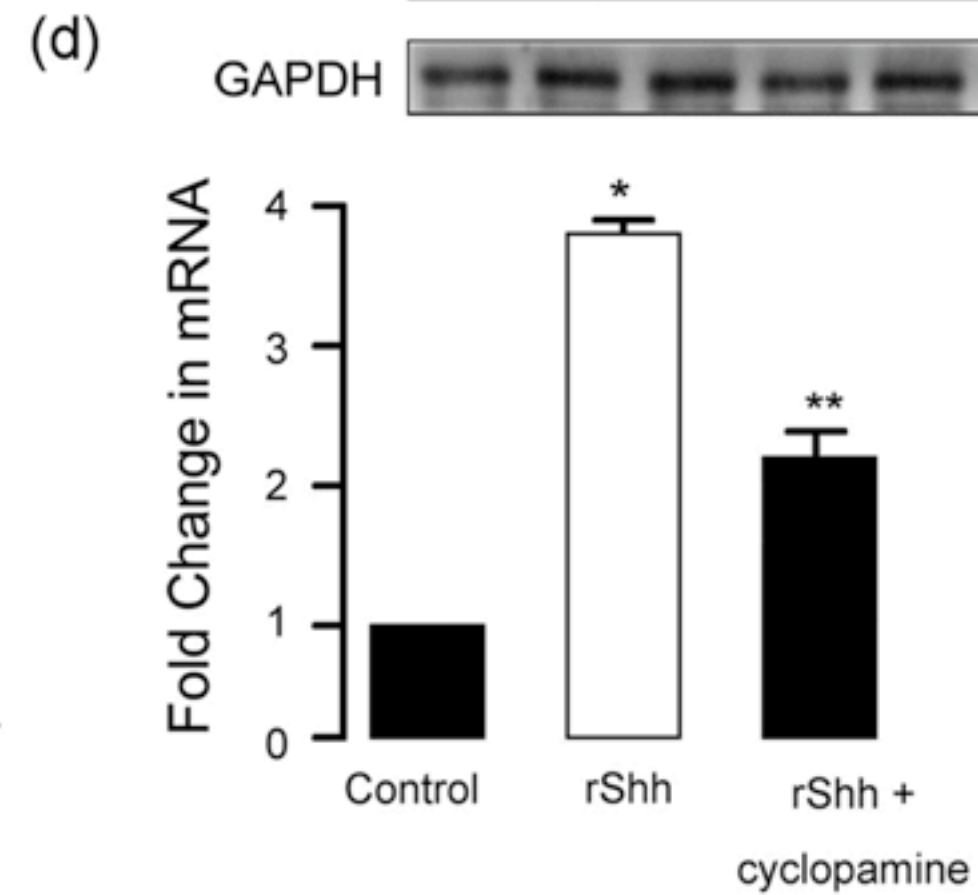

*Supplemental Figure II*

(a)

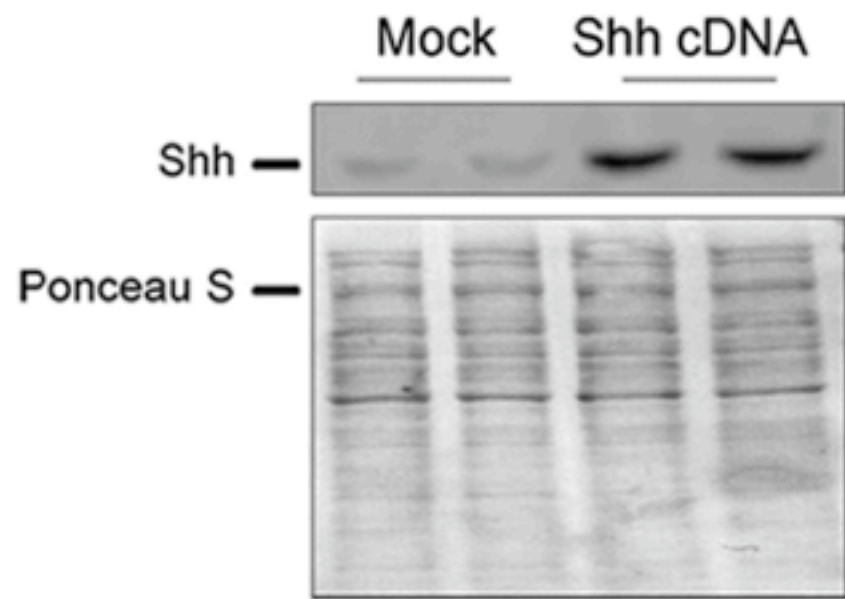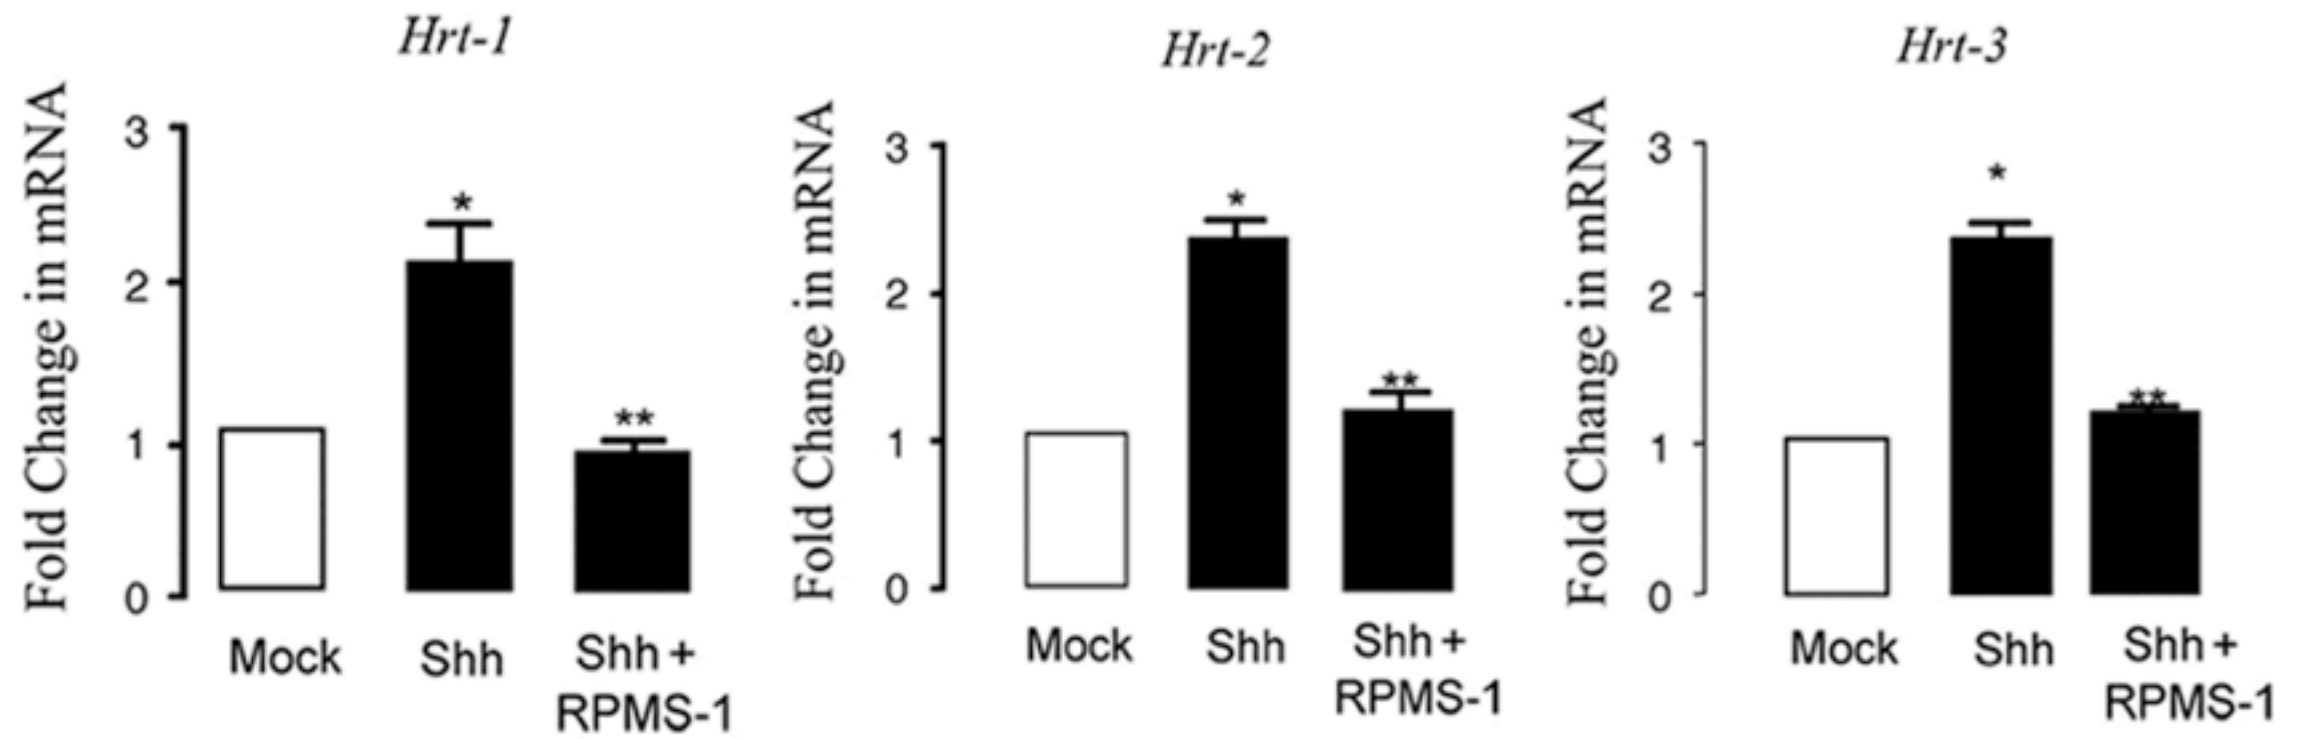

(b)

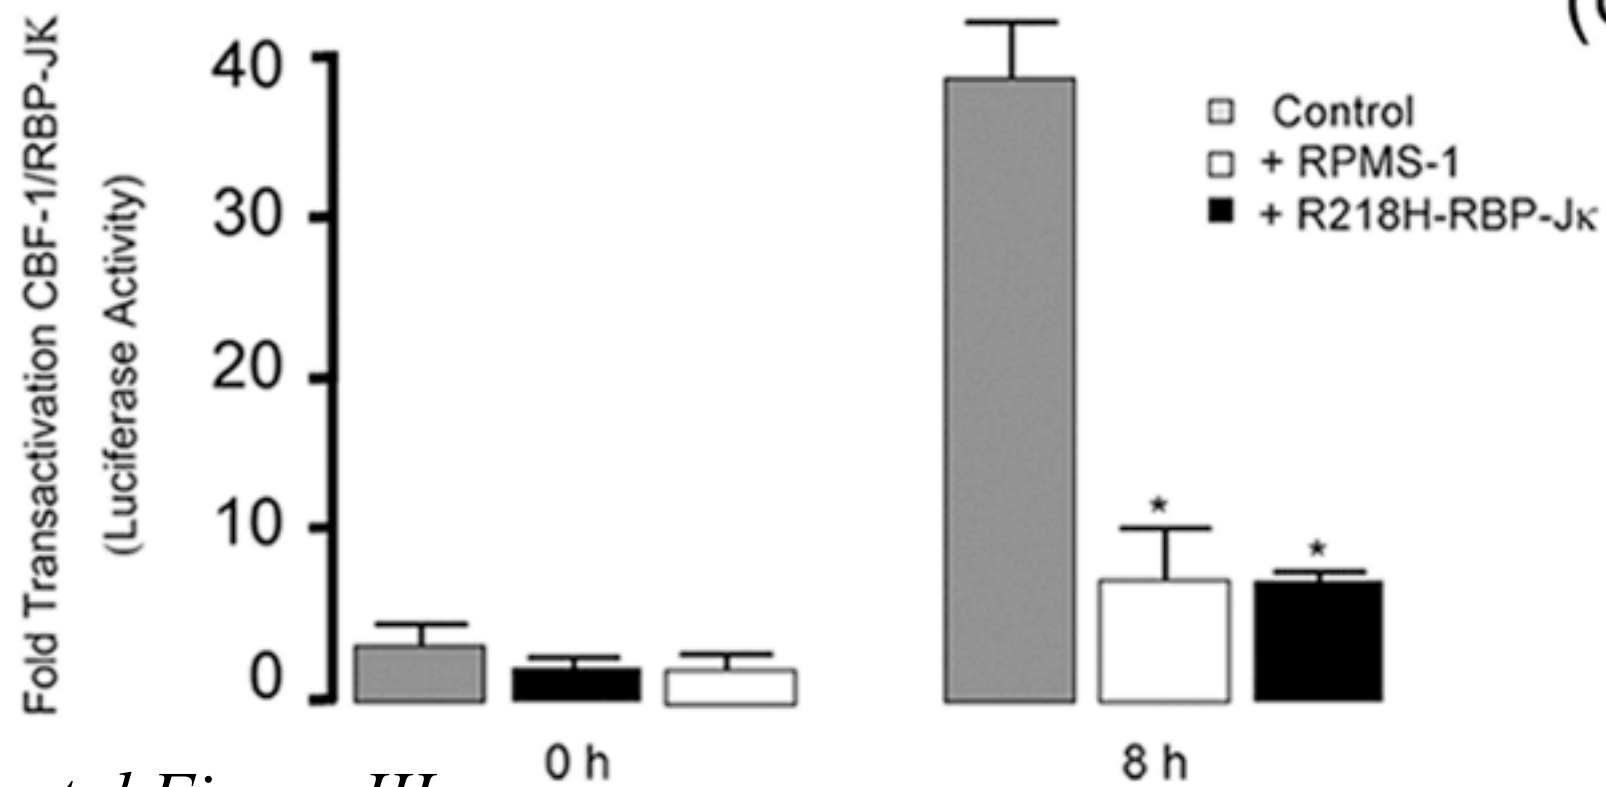

(c)

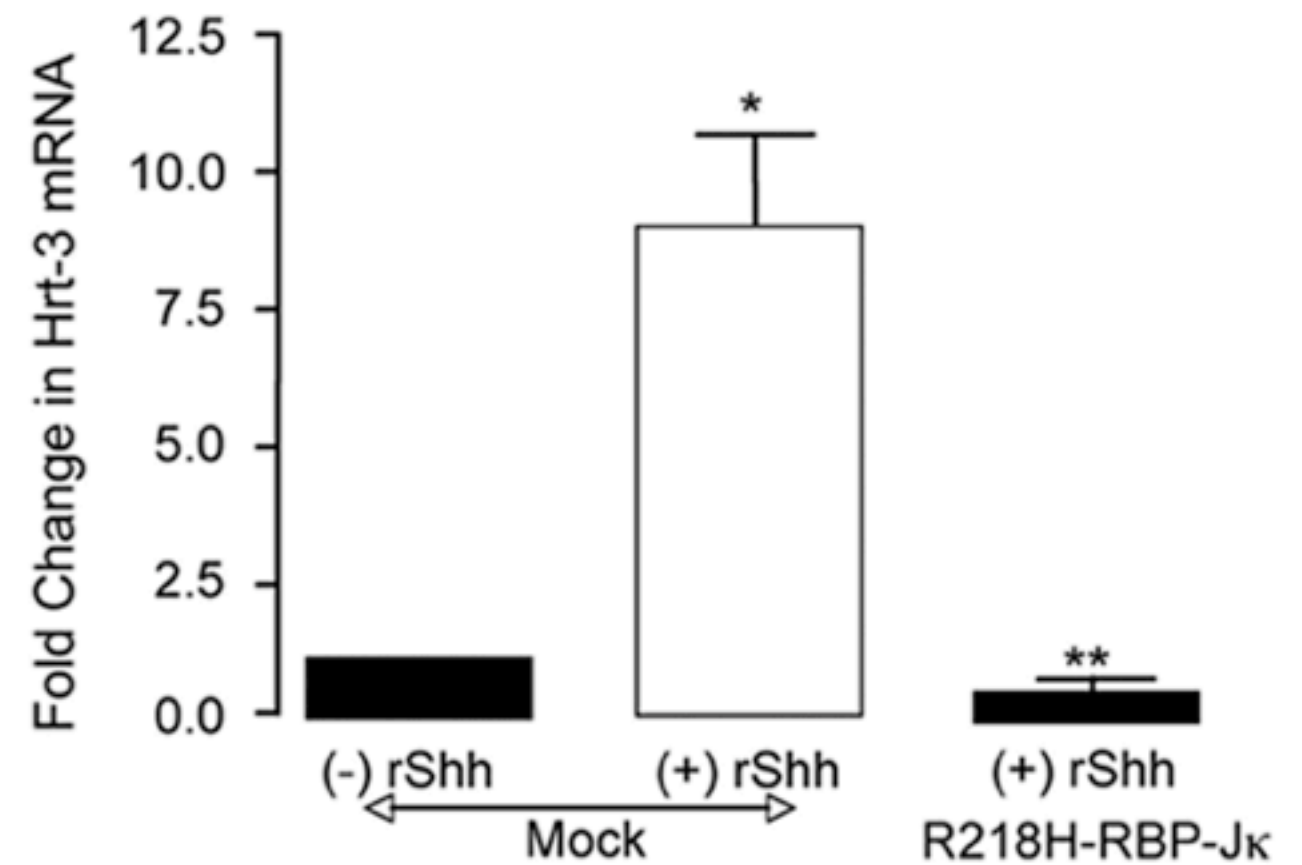

Supplement: NIHMS126197-supplement-1.pdf [file NIHMS126197-supplement-1.pdf]
